# Supplementary material
Source: Springer Nature journal article supplement (https://www.springermedizin.de/resource/supplementary/12883_2004_41_MOESM1_ESM.pdf/9456722)

A B C D E

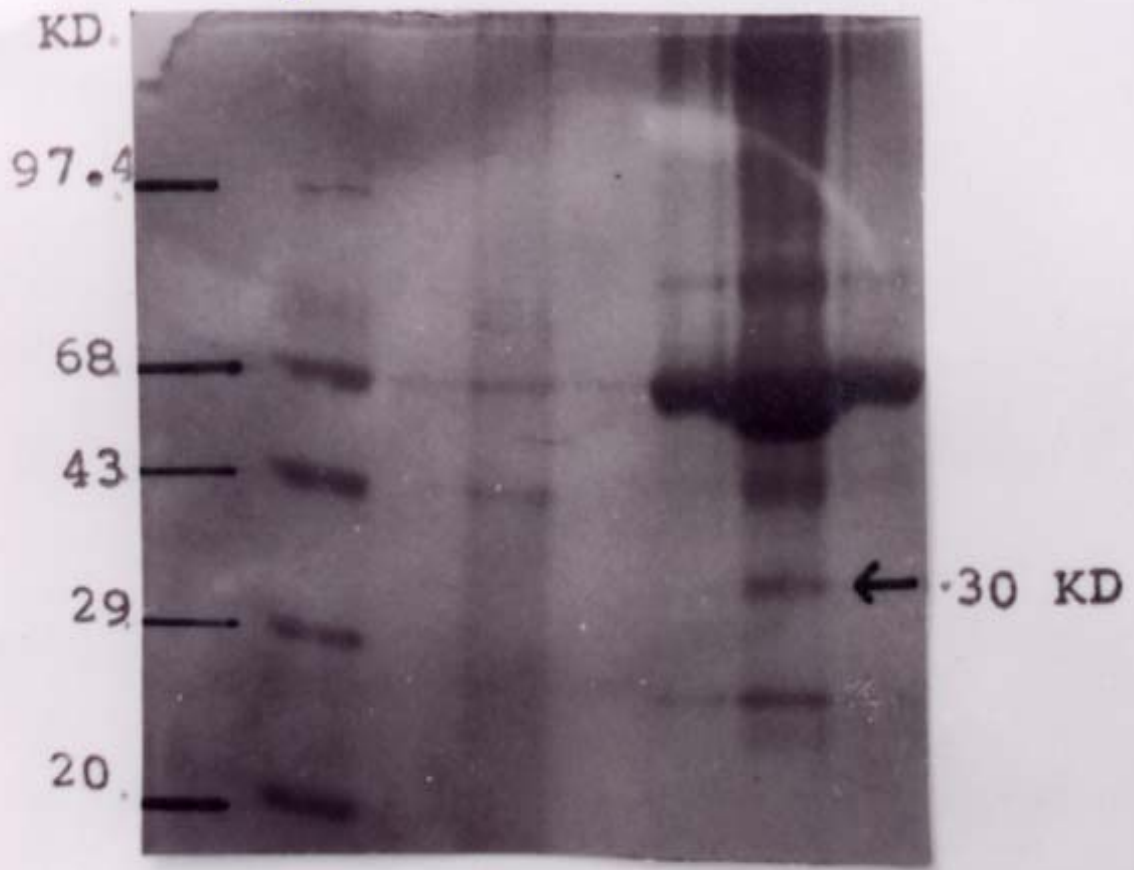

Supplement: MOESM1 [file 9456722]
